# Supplementary material for: Chemotaxis and degradation of organophosphate compound by a novel moderately thermo-halo tolerant Pseudomonas sp. strain BUR11: evidence for possible existence of two pathways for degradation
Source: PeerJ journal article supplement (doi:10.7717/peerj.1378), 2015-11-10
Supplement: Raw_data.zip [file Raw_data.zip]

## SAMPLE INFORMATION

|                   |                          |                     |          |
|-------------------|--------------------------|---------------------|----------|
| Sample Name:      | par 72 t                 | Acquired By:        | System   |
| Sample Type:      | Unknown                  | Sample Set Name:    |          |
| Vial:             | 1                        | Acq. Method Set:    | training |
| Injection #:      | 5                        | Processing Method:  | par 48 t |
| Injection Volume: | 20.00 ul                 | Channel Name:       | 486      |
| Run Time:         | 15.0 Minutes             | Proc. Chnl. Descr.: |          |
|                   |                          |                     |          |
| Date Acquired:    | 9/12/2013 2:06:09 PM IST |                     |          |
| Date Processed:   | 9/13/2013 1:07:31 PM IST |                     |          |

## Auto-Scaled Chromatogram

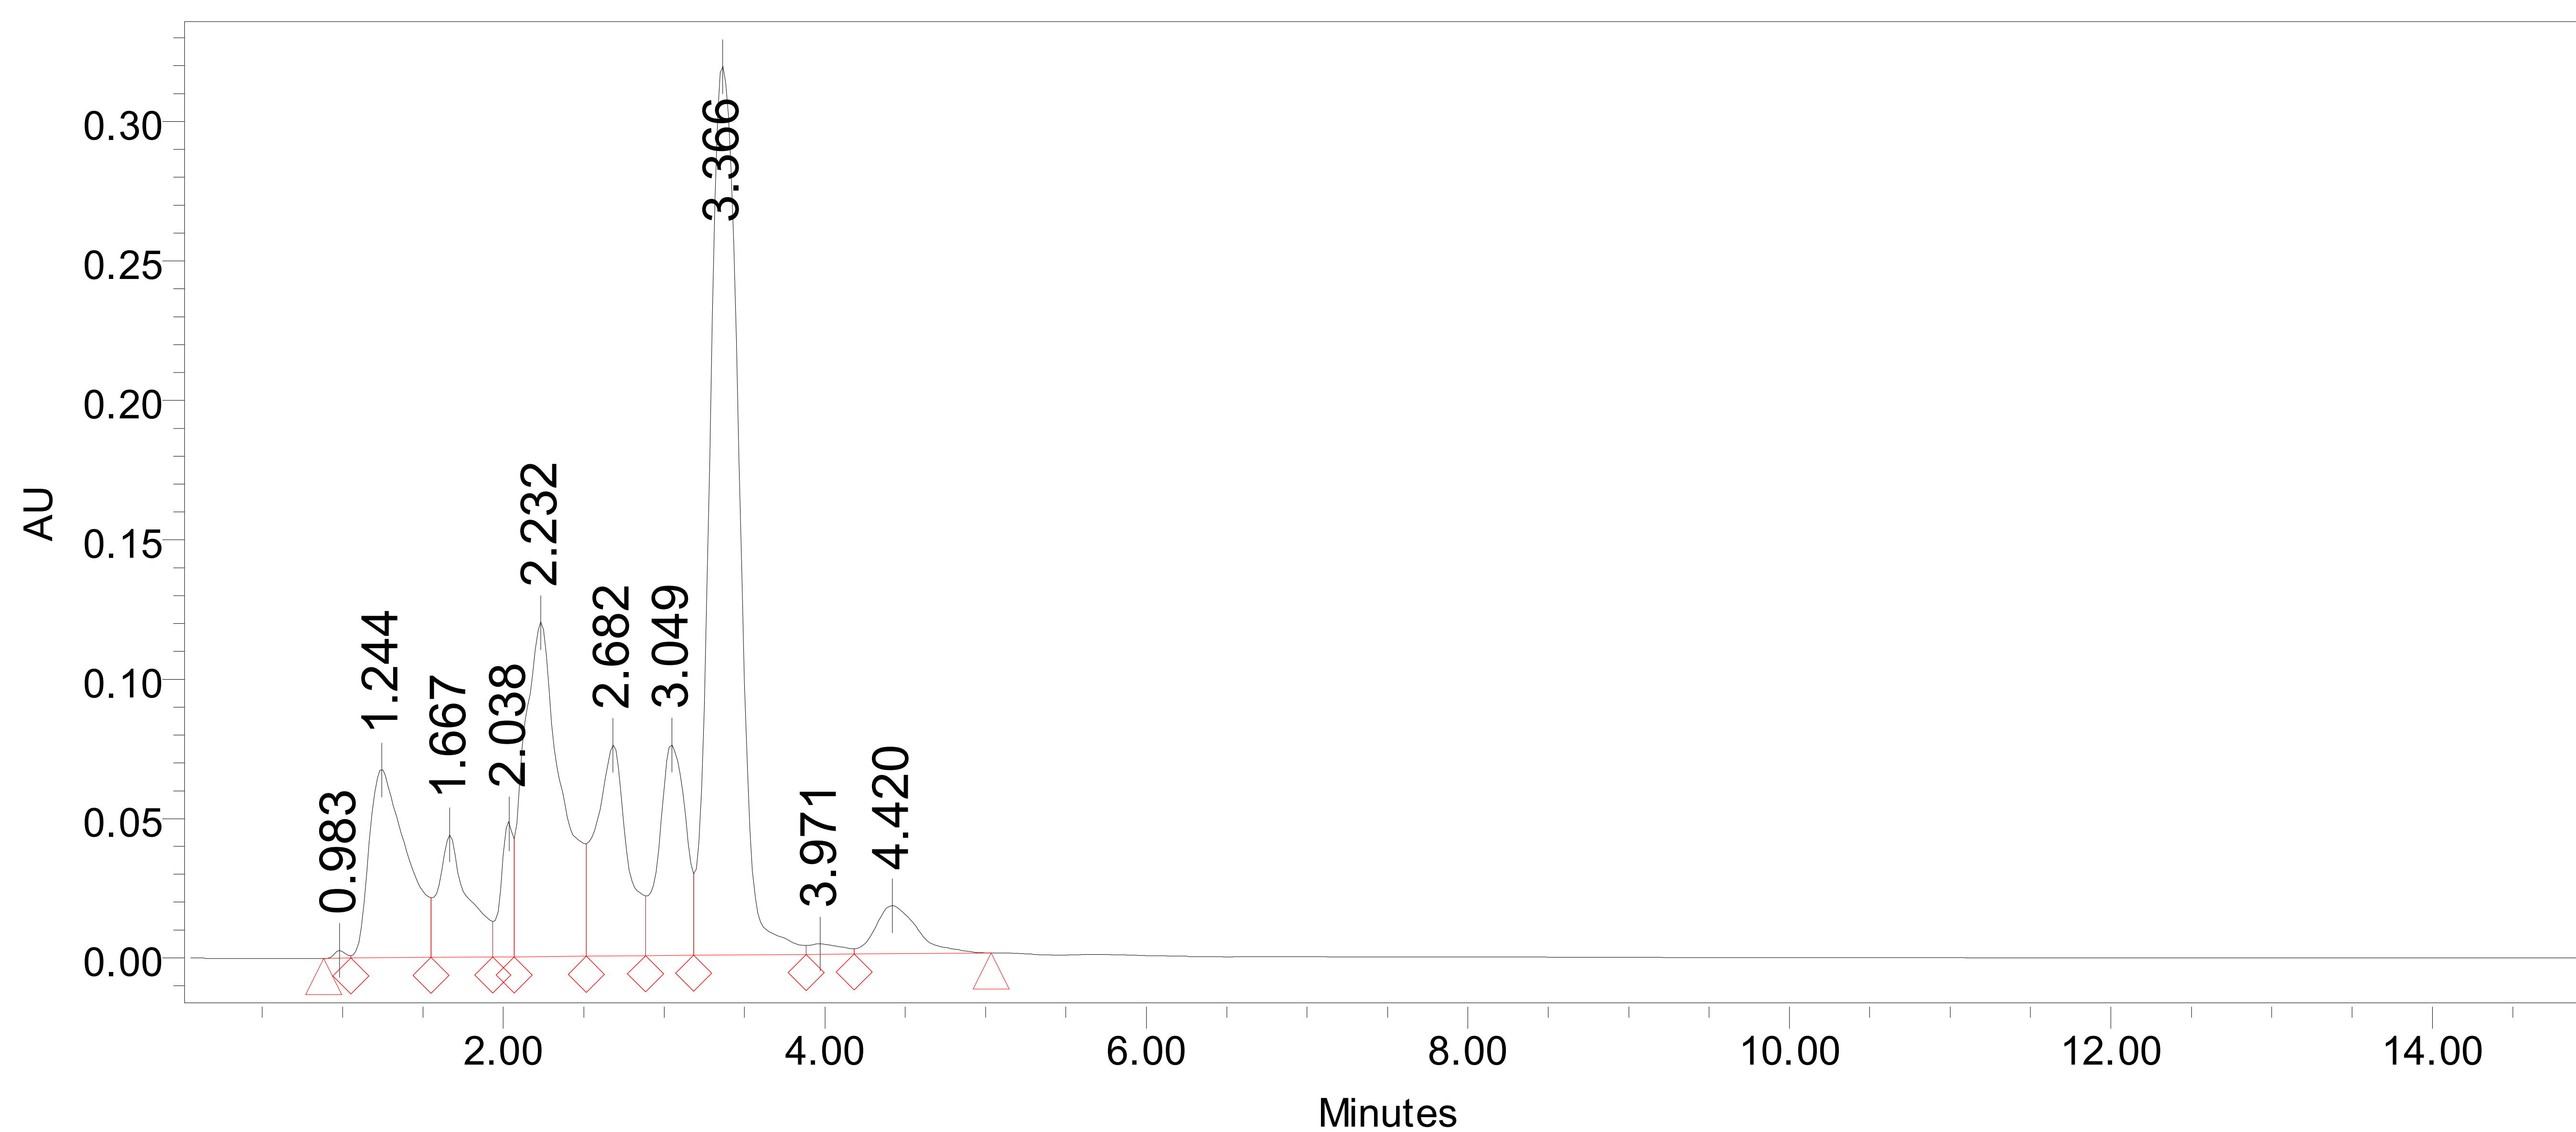

## Peak Results

|    | Name | RT    | Area    | Height | Amount | Units |
|----|------|-------|---------|--------|--------|-------|
| 1  |      | 0.983 | 12985   | 2762   |        |       |
| 2  |      | 1.244 | 1111830 | 67503  |        |       |
| 3  |      | 1.667 | 576424  | 43810  |        |       |
| 4  |      | 2.038 | 257508  | 48246  |        |       |
| 5  |      | 2.232 | 1972394 | 119882 |        |       |
| 6  |      | 2.682 | 1031369 | 75587  |        |       |
| 7  |      | 3.049 | 881003  | 75494  |        |       |
| 8  |      | 3.366 | 4051921 | 318920 |        |       |
| 9  |      | 3.971 | 54199   | 3746   |        |       |
| 10 |      | 4.420 | 312672  | 17266  |        |       |
