# Supplementary material for: Chemotaxis and degradation of organophosphate compound by a novel moderately thermo-halo tolerant Pseudomonas sp. strain BUR11: evidence for possible existence of two pathways for degradation
Source: PeerJ journal article supplement (doi:10.7717/peerj.1378), 2015-11-10
Supplement: Raw_data.zip [file Raw_data.zip]

## SAMPLE INFORMATION

|                   |                          |                     |          |
|-------------------|--------------------------|---------------------|----------|
| Sample Name:      | par 24 t                 | Acquired By:        | System   |
| Sample Type:      | Unknown                  | Sample Set Name:    |          |
| Vial:             | 1                        | Acq. Method Set:    | training |
| Injection #:      | 3                        | Processing Method:  | par 24 t |
| Injection Volume: | 20.00 ul                 | Channel Name:       | 486      |
| Run Time:         | 15.0 Minutes             | Proc. Chnl. Descr.: |          |
|                   |                          |                     |          |
| Date Acquired:    | 9/12/2013 1:06:56 PM IST |                     |          |
| Date Processed:   | 9/13/2013 1:05:11 PM IST |                     |          |

## Auto-Scaled Chromatogram

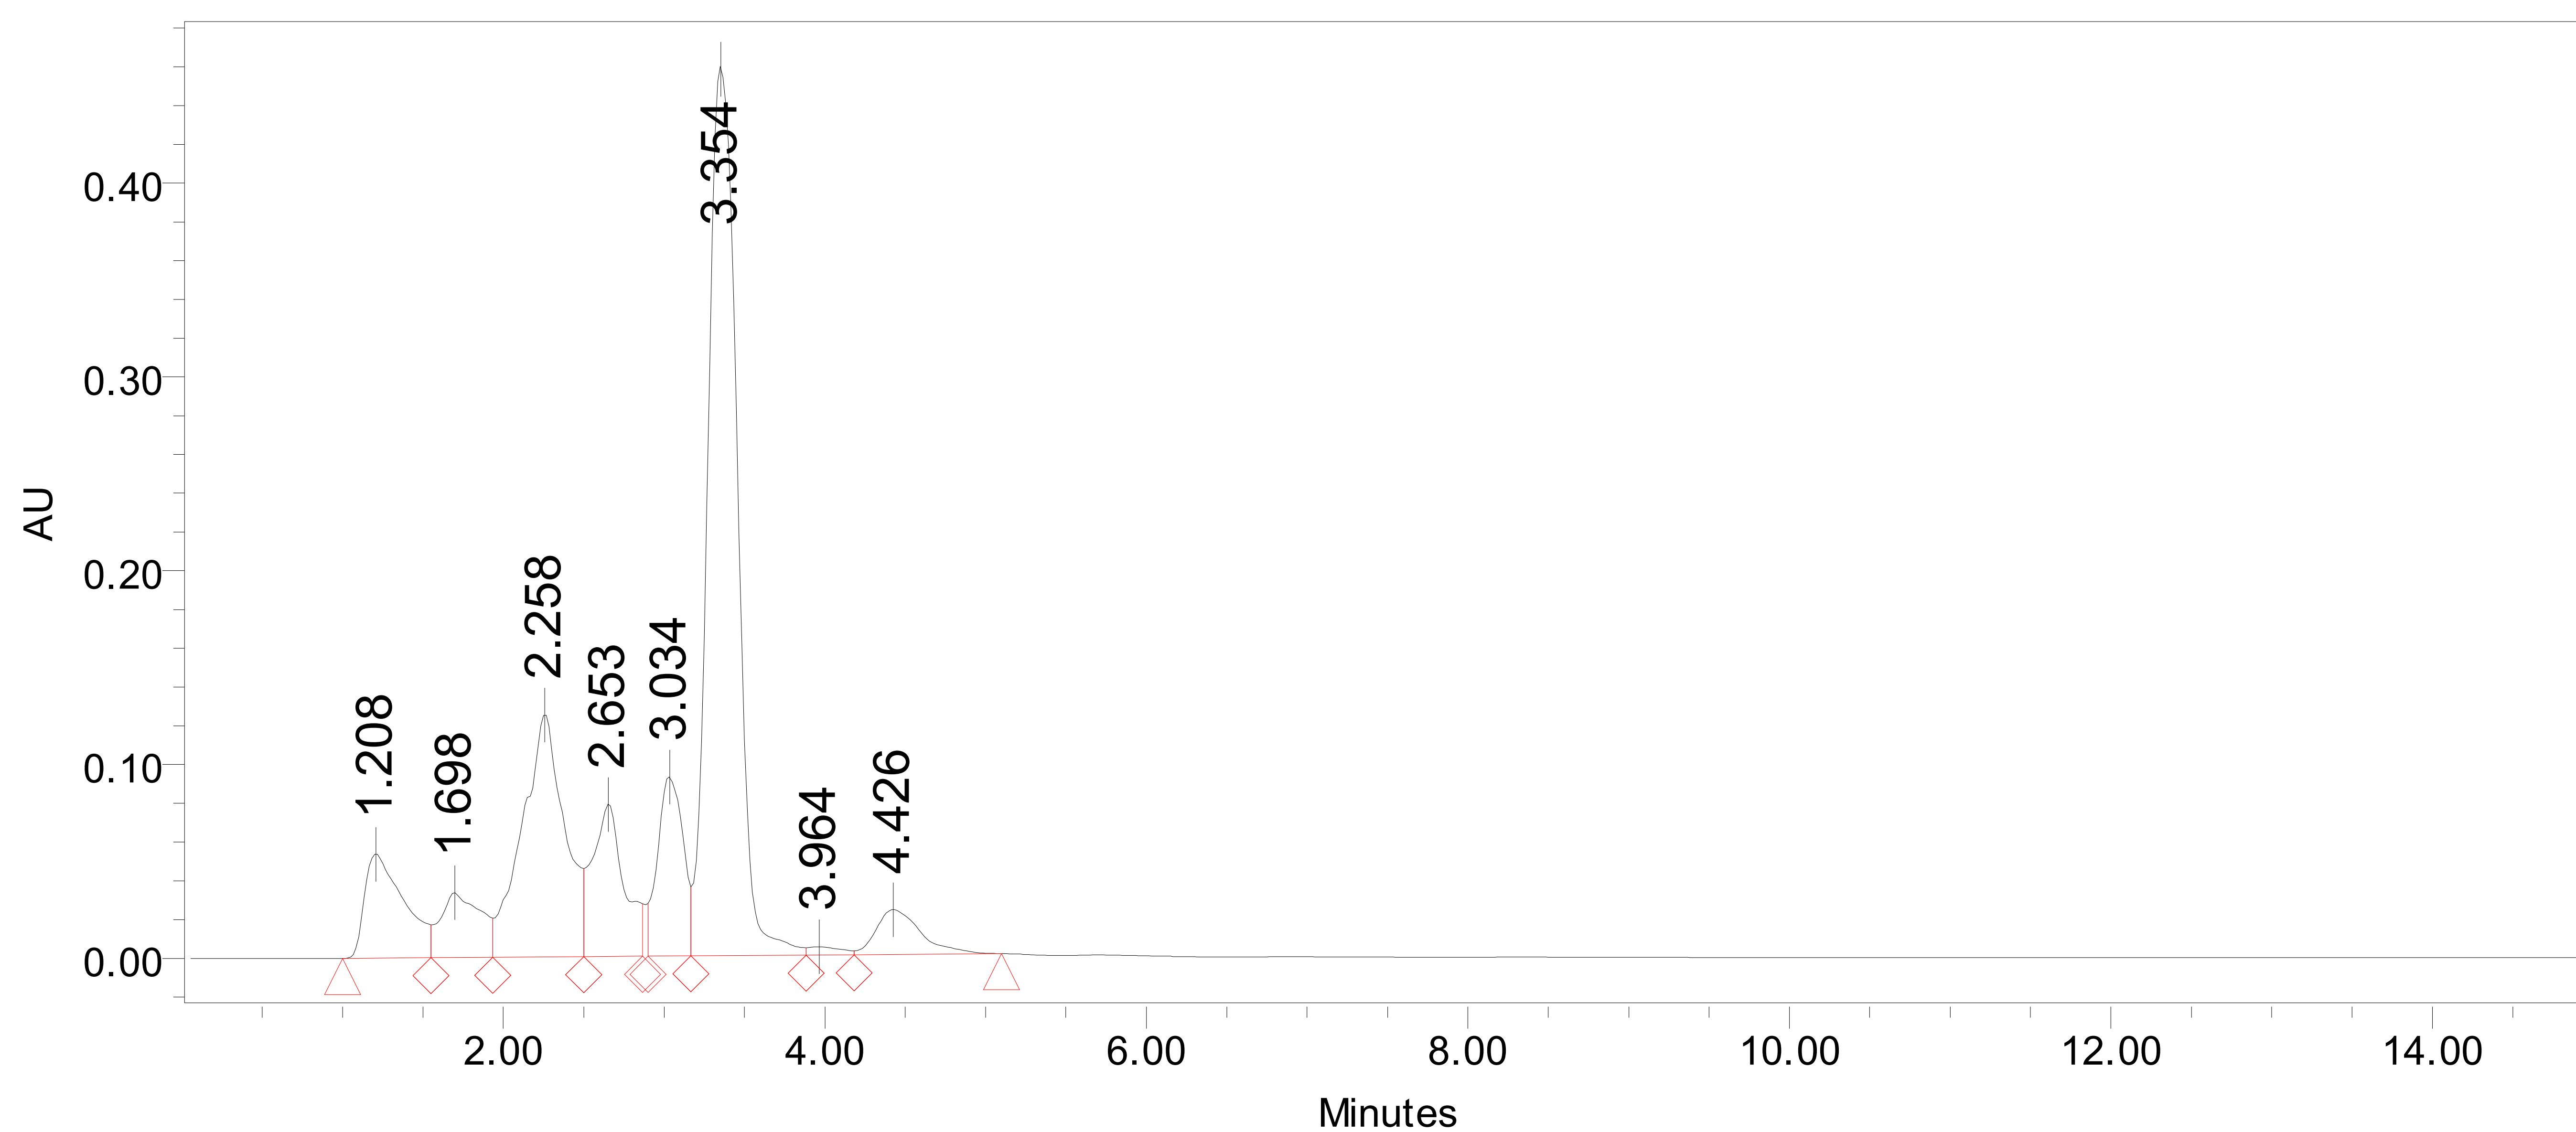

## Peak Results

|   | Name | RT    | Area    | Height | Amount | Units |
|---|------|-------|---------|--------|--------|-------|
| 1 |      | 1.208 | 915590  | 53684  |        |       |
| 2 |      | 1.698 | 581744  | 33327  |        |       |
| 3 |      | 2.258 | 2312866 | 125280 |        |       |
| 4 |      | 2.653 | 1081953 | 78429  |        |       |
| 5 |      | 3.034 | 1020487 | 92423  |        |       |
| 6 |      | 3.354 | 5824878 | 459393 |        |       |
| 7 |      | 3.964 | 60086   | 4276   |        |       |
| 8 |      | 4.426 | 447894  | 23247  |        |       |
