# Supplementary material for: Chemotaxis and degradation of organophosphate compound by a novel moderately thermo-halo tolerant Pseudomonas sp. strain BUR11: evidence for possible existence of two pathways for degradation
Source: PeerJ journal article supplement (doi:10.7717/peerj.1378), 2015-11-10
Supplement: Raw_data.zip [file Raw_data.zip]

GC

File :D:\GC-MS-Year-2015\JAN-15\06-01-15\7814-265-0059.D  
Operator : PRABAKARAN  
Acquired : 6 Jan 2015 11:01 using AcqMethod UN\_KNOWN\_WITHOUT FORNT\_COLUMN.M  
Instrument : GC MS  
Sample Name: SAMPLE- I  
Misc Info :  
Vial Number: 15

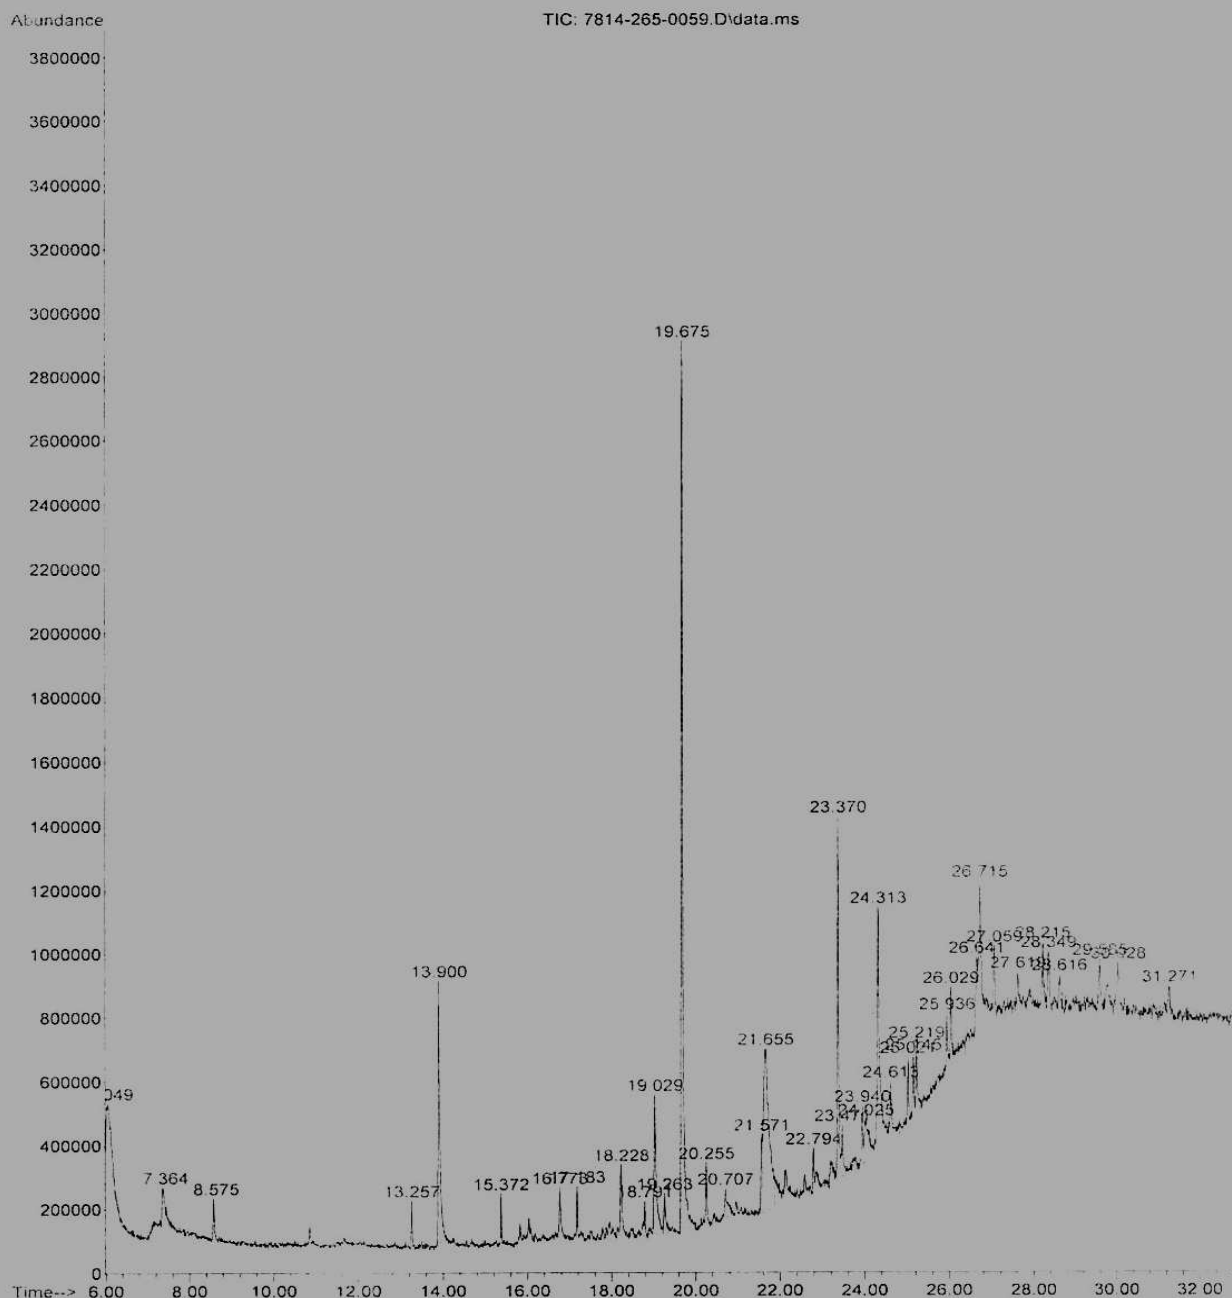

Data Path : D:\GC-MS-Year-2015\JAN-15\06-01-15\  
 Data File : 7814-265-0059.D  
 Acq On : 6 Jan 2015 11:01  
 Operator : PRABAKARAN  
 Sample : SAMPLE- 1  
 Misc :  
 ALS Vial : 15 Sample Multiplier: 1

Search Libraries: C:\Database\NIST11.L Minimum Quality: 0

Unknown Spectrum: Apex

Integration Events: ChemStation Integrator - 7814-357-0048.E

| PK# | RT     | Area# | Library/ID                          | Ref#   | CAS#         | Qual |
|-----|--------|-------|-------------------------------------|--------|--------------|------|
| 1   | 6.052  | 2.37  | C:\Database\NIST11.L                |        |              |      |
|     |        |       | Adipamide                           | 20534  | 000628-94-4  | 49   |
|     |        |       | Pregn-5-en-3-ol, 20-amino-, (3.beta | 158999 | 005035-10-9  | 47   |
|     |        |       | a.,20S)-                            |        |              |      |
|     |        |       | 2,2-Dichlorocyclopropanecarboxamid  | 26258  | 075885-60-8  | 47   |
| 2   | 7.367  | 0.79  | C:\Database\NIST11.L                |        |              |      |
|     |        |       | Atrolactic acid                     | 35611  | 000515-30-0  | 59   |
|     |        |       | .alpha.-Hydroxy-.alpha.-methylbenz  | 82925  | 005623-26-7  | 59   |
|     |        |       | yl phenyl ketone                    |        |              |      |
|     |        |       | Benzaldehyde dimethyl acetal        | 26004  | 001125-88-8  | 59   |
| 3   | 8.578  | 0.56  | C:\Database\NIST11.L                |        |              |      |
|     |        |       | O,O,O-Triethyl thiophosphate        | 59987  | 000126-68-1  | 94   |
|     |        |       | O,O,O-Triethyl thiophosphate        | 59986  | 000126-68-1  | 91   |
|     |        |       | Asulam                              | 86364  | 003337-71-1  | 43   |
| 4   | 13.258 | 0.60  | C:\Database\NIST11.L                |        |              |      |
|     |        |       | Cycloheptasiloxane, tetradecamethy  | 236968 | 000107-50-6  | 91   |
|     |        |       | l-                                  |        |              |      |
|     |        |       | Cycloheptasiloxane, tetradecamethy  | 236969 | 000107-50-6  | 91   |
|     |        |       | l-                                  |        |              |      |
|     |        |       | Pentasiloxane, dodecamethyl-        | 204093 | 000141-63-9  | 38   |
| 5   | 13.897 | 4.62  | C:\Database\NIST11.L                |        |              |      |
|     |        |       | Butylated Hydroxytoluene            | 77554  | 000128-37-0  | 97   |
|     |        |       | Butylated Hydroxytoluene            | 77555  | 000128-37-0  | 97   |
|     |        |       | Butylated Hydroxytoluene            | 77553  | 000128-37-0  | 91   |
| 6   | 15.375 | 0.51  | C:\Database\NIST11.L                |        |              |      |
|     |        |       | Benzoic acid, 2,4-bis[(trimethylsi  | 196465 | 010586-16-0  | 38   |
|     |        |       | yl)oxy]-, trimethylsilyl ester      |        |              |      |
|     |        |       | Silane, [[4-[1,2-bis[(trimethylsil  | 228735 | 056114-62-6  | 37   |
|     |        |       | yl)oxy]ethyl]-1,2-phenylene]bis(ox  |        |              |      |
|     |        |       | y)]bis[tribethyl-                   |        |              |      |
|     |        |       | Cyclopentasiloxane, decamethyl-     | 196318 | 000541-02-6  | 35   |
| 7   | 16.772 | 0.86  | C:\Database\NIST11.L                |        |              |      |
|     |        |       | Phenol, 2,6-bis(1-methylpropyl)-    | 46102  | 005510-99-6  | 50   |
|     |        |       | bis(2-methylpropyl) 4,5-dimethylbe  | 149718 | 1000305-39-8 | 50   |
|     |        |       | nzene-1,2-dicarboxylate             |        |              |      |
|     |        |       | 3-Buten-2-one, 4-(2,6,6-trimethyl-  | 54652  | 014901-07-6  | 50   |
|     |        |       | 1-cyclohexen-1-yl)-                 |        |              |      |
| 8   | 17.180 | 0.47  | C:\Database\NIST11.L                |        |              |      |
|     |        |       | 1,1,1,5,7,7,7-Heptamethyl-3,3-bis(  | 225661 | 038147-00-1  | 45   |
|     |        |       | trimethylsiloxy)tetrasiloxane       |        |              |      |
|     |        |       | Hexasiloxane, tetradecanethyl-      | 228692 | 000107-52-8  | 27   |
|     |        |       | 2H-1,4-Benzodiazepin-2-one, 7-chlo  | 222094 | 055319-93-2  | 22   |
|     |        |       | ro-1,3-dihydro-5-phenyl-1-(trimeth  |        |              |      |
|     |        |       | ylsilyl)-3-[(trimethylsilyl)oxy]-   |        |              |      |
| 9   | 18.228 | 1.26  | C:\Database\NIST11.L                |        |              |      |
|     |        |       | Dibutyl phthalate                   | 125787 | 000084-74-2  | 64   |
|     |        |       | 1,2-Benzenedicarboxylic acid, dihe  | 172559 | 000084-75-3  | 59   |

xyl ester

Phthalic acid, heptyl hept-4-yl ester 191990 1000356-78-8 53

ter

|    |        |       |                                                                |        |                 |
|----|--------|-------|----------------------------------------------------------------|--------|-----------------|
| 10 | 18.792 | 0.61  | C:\Database\NIST11.L                                           |        |                 |
|    |        |       | Octasiloxane, 1,1,3,3,5,5,7,7,9,9, 240341 019095-24-0 40       |        |                 |
|    |        |       | 11,11,13,13,15,15-hexadecamethyl-                              |        |                 |
|    |        |       | Cyclononasiloxane, octadecamethyl-                             | 242431 | 000556-71-8 32  |
|    |        |       | 1,1,1,5,5,5,7-Heptamethyl-3,3-bis( 225661 038147-00-1 32       |        |                 |
|    |        |       | trimethylsiloxy) tetrasiloxane                                 |        |                 |
| 11 | 19.030 | 3.45  | C:\Database\NIST11.L                                           |        |                 |
|    |        |       | Aminoparathion                                                 | 111167 | 003735-01-1 94  |
|    |        |       | 4-Aminothiophenol                                              | 10811  | 001193-02-8 25  |
|    |        |       | 3-Aminobenzenethiol                                            | 10813  | 022948-02-3 22  |
| 12 | 19.260 | 0.81  | C:\Database\NIST11.L                                           |        |                 |
|    |        |       | Dibutyl phthalate                                              | 125786 | 000084-74-2 46  |
|    |        |       | Tricyclo[4.3.1.1(3,8)]undecane-3-carboxylic acid, methyl ester | 67770  | 031061-61-7 46  |
|    |        |       | m-Tolyl isothiocyanate                                         | 23555  | 000621-30-7 46  |
| 13 | 19.676 | 14.80 | C:\Database\NIST11.L                                           |        |                 |
|    |        |       | Parathion                                                      | 136570 | 000056-38-2 96  |
|    |        |       | Parathion                                                      | 136574 | 000056-38-2 96  |
|    |        |       | Parathion                                                      | 136573 | 000056-38-2 95  |
| 14 | 20.256 | 0.89  | C:\Database\NIST11.L                                           |        |                 |
|    |        |       | Dodecanoic acid, 3,7,11-trimethyl- 234094 1000313-98-8 37      |        |                 |
|    |        |       | 3,4-bis(trimethylsilyloxy)-, trimethylsilyl ester              |        |                 |
|    |        |       | Sarcosine, N-isobutyryl-, tetradecyl ester                     | 187376 | 1000321-27-5 22 |
|    |        |       | Terephthalic acid, but-2-enyl heptyl ester                     | 159716 | 1000356-31-5 22 |
| 15 | 20.709 | 0.88  | C:\Database\NIST11.L                                           |        |                 |
|    |        |       | l-Alanine, N-(5-chlorovaleryl)-, methyl ester                  | 78470  | 1000299-71-3 38 |
|    |        |       | 2,2-Dichlorocyclopropanecarboxamide                            | 26258  | 075885-60-8 38  |
|    |        |       | Metaraminol                                                    | 36216  | 000054-49-9 37  |
| 16 | 21.570 | 1.19  | C:\Database\NIST11.L                                           |        |                 |
|    |        |       | Benzaldehyde, 2-nitro-, diaminomethylidenhydrazone             | 67108  | 102632-31-5 43  |
|    |        |       | Sarcosine, N-isobutyryl-, tetradecyl ester                     | 187376 | 1000321-27-5 38 |
|    |        |       | Octasiloxane, 1,1,3,3,5,5,7,7,9,9, 240341 019095-24-0 38       |        |                 |
|    |        |       | 11,11,13,13,15,15-hexadecamethyl-                              |        |                 |
| 17 | 21.652 | 10.07 | C:\Database\NIST11.L                                           |        |                 |
|    |        |       | Phenol, 4,4'-(1-methylethylidene)bis-                          | 84554  | 000080-05-7 98  |
|    |        |       | Phenol, 4,4'-(1-methylethylidene)bis-                          | 84556  | 000080-05-7 95  |
|    |        |       | Phenol, 4,4'-(1-methylethylidene)bis-                          | 84555  | 000080-05-7 70  |
| 18 | 22.796 | 0.63  | C:\Database\NIST11.L                                           |        |                 |
|    |        |       | Norpseudoephedrine                                             | 24943  | 036393-56-3 30  |
|    |        |       | Phenethylamine, p, .alpha.-dimethyl                            | 23388  | 000064-11-9 27  |
|    |        |       | 1-Methyl-2-phenoxyethylamine                                   | 24974  | 035205-54-0 27  |
| 19 | 23.369 | 4.72  | C:\Database\NIST11.L                                           |        |                 |
|    |        |       | Hexanedioic acid, bis(2-ethylhexyl) ester                      | 196965 | 000103-23-1 93  |
|    |        |       | Diisooctyl adipate                                             | 196853 | 001330-86-5 90  |
|    |        |       | Hexanedioic acid, bis(2-ethylhexyl) ester                      | 196973 | 000103-23-1 90  |
| 20 | 23.472 | 0.91  | C:\Database\NIST11.L                                           |        |                 |
|    |        |       | 1,4-Benzenedicarboxamide, N,N'-bis                             | 222756 | 068516-51-8 27  |

|    |        |      |                                                                      |        |              |    |
|----|--------|------|----------------------------------------------------------------------|--------|--------------|----|
|    |        |      | (2-hydroxy-1-methyl-2-phenylethyl)                                   |        |              |    |
|    |        |      | Cyclotrisiloxane, hexamethyl-                                        | 79619  | 000541-05-9  | 27 |
|    |        |      | 5-Acetamido-4,7-dioxo-4,7-dihydrobenzofurazan                        | 67100  | 153136-27-7  | 27 |
| 21 | 23.940 | 0.77 | C:\Database\NIST11.L                                                 |        |              |    |
|    |        |      | Octasiloxane, 1,1,3,3,5,5,7,7,9,9,11,11,13,13,15,15-hexadecamethyl-  | 240341 | 019095-24-0  | 64 |
|    |        |      | Cyclononasiloxane, octadecamethyl-                                   | 242431 | 000556-71-8  | 37 |
|    |        |      | 2-Ethylacridine                                                      | 66996  | 055751-83-2  | 25 |
| 22 | 24.022 | 1.36 | C:\Database\NIST11.L                                                 |        |              |    |
|    |        |      | Bifemelane                                                           | 118352 | 090293-01-9  | 43 |
|    |        |      | Propanamide                                                          | 727    | 000079-05-0  | 27 |
|    |        |      | Epinephrine                                                          | 48246  | 000051-43-4  | 25 |
| 23 | 24.312 | 6.93 | C:\Database\NIST11.L                                                 |        |              |    |
|    |        |      | Cyclohexa-2,5-diene-1,4-dione, 2-methyl-5-(4-morpholinyl)-           | 66749  | 002158-89-6  | 44 |
|    |        |      | Benzo[h]quinoline, 2,4-dimethyl-                                     | 67018  | 000605-67-4  | 38 |
|    |        |      | 2-Ethylacridine                                                      | 66996  | 055751-83-2  | 30 |
| 24 | 24.616 | 1.35 | C:\Database\NIST11.L                                                 |        |              |    |
|    |        |      | Naphthalene, 6-chloro-1-nitro-                                       | 66603  | 038396-29-1  | 47 |
|    |        |      | 1H-Indole-3-ethanamine, 6-fluoro-beta.-methyl-                       | 54300  | 077590-52-4  | 38 |
|    |        |      | Propanamide                                                          | 727    | 000079-05-0  | 35 |
| 25 | 25.025 | 1.38 | C:\Database\NIST11.L                                                 |        |              |    |
|    |        |      | Octasiloxane, 1,1,3,3,5,5,7,7,9,9,11,11,13,13,15,15-hexadecamethyl-  | 240341 | 019095-24-0  | 83 |
|    |        |      | Tetrasiloxane, decamethyl-                                           | 152279 | 000141-62-8  | 43 |
|    |        |      | 2-Ethylacridine                                                      | 66996  | 055751-83-2  | 38 |
| 26 | 25.144 | 1.62 | C:\Database\NIST11.L                                                 |        |              |    |
|    |        |      | Eicosane                                                             | 129490 | 000112-95-8  | 40 |
|    |        |      | Eicosane                                                             | 129491 | 000112-95-8  | 40 |
|    |        |      | Benzo[h]quinoline, 2,4-dimethyl-                                     | 67018  | 000605-67-4  | 30 |
| 27 | 25.218 | 1.61 | C:\Database\NIST11.L                                                 |        |              |    |
|    |        |      | Indolizine, 2-(4-methylphenyl)-                                      | 67014  | 007496-81-3  | 38 |
|    |        |      | 4-Quinolinecarboxylic acid, 2-chloro-                                | 66606  | 005467-57-2  | 38 |
|    |        |      | Tetrasiloxane, decamethyl-                                           | 152278 | 000141-62-8  | 35 |
| 28 | 25.939 | 2.36 | C:\Database\NIST11.L                                                 |        |              |    |
|    |        |      | Benzo[h]quinoline, 2,4-dimethyl-                                     | 67018  | 000605-67-4  | 52 |
|    |        |      | Cyclotrisiloxane, hexamethyl-                                        | 79619  | 000541-05-9  | 50 |
|    |        |      | Tetrasiloxane, decamethyl-                                           | 152279 | 000141-62-8  | 50 |
| 29 | 26.028 | 2.27 | C:\Database\NIST11.L                                                 |        |              |    |
|    |        |      | Octasiloxane, 1,1,3,3,5,5,7,7,9,9,11,11,13,13,15,15-hexadecamethyl-  | 240341 | 019095-24-0  | 38 |
|    |        |      | Benzo[h]quinoline, 2,4-dimethyl-                                     | 67018  | 000605-67-4  | 35 |
|    |        |      | Cyclotrisiloxane, hexamethyl-                                        | 79619  | 000541-05-9  | 35 |
| 30 | 26.644 | 3.38 | C:\Database\NIST11.L                                                 |        |              |    |
|    |        |      | Tetrasiloxane, decamethyl-                                           | 152278 | 000141-62-8  | 43 |
|    |        |      | 9H-Fluorene-2-carboxylic acid, 9-oxo-, (2-hydroxyethyl)(methyl)amide | 128371 | 1000316-02-1 | 35 |
|    |        |      | Cyclotrisiloxane, hexamethyl-                                        | 79617  | 000541-05-9  | 30 |
| 31 | 26.719 | 6.19 | C:\Database\NIST11.L                                                 |        |              |    |
|    |        |      | Benzo[h]quinoline, 2,4-dimethyl-                                     | 67018  | 000605-67-4  | 43 |
|    |        |      | Cyclotrisiloxane, hexamethyl-                                        | 79619  | 000541-05-9  | 43 |
|    |        |      | Cyclotrisiloxane, hexamethyl-                                        | 79617  | 000541-05-9  | 30 |
| 32 | 27.060 | 3.50 | C:\Database\NIST11.L                                                 |        |              |    |
|    |        |      | 1,2-Bis(trimethylsilyl)benzene                                       | 78918  | 017151-09-6  | 50 |
|    |        |      | Octasiloxane, 1,1,3,3,5,5,7,7,9,9,11,11,13,13,15,15-hexadecamethyl-  | 240341 | 019095-24-0  | 45 |
|    |        |      | Tris(tert-butylidimethylsilyloxy)ar                                  | 230548 | 1000366-57-5 | 43 |

sane

|    |        |      |                                     |        |              |    |
|----|--------|------|-------------------------------------|--------|--------------|----|
| 33 | 27.617 | 4.46 | C:\Database\NIST11.L                |        |              |    |
|    |        |      | Benzo[h]quinoline, 2,4-dimethyl-    | 67018  | 000605-67-4  | 43 |
|    |        |      | Cyclotrisiloxane, hexamethyl-       | 79619  | 000541-05-9  | 43 |
|    |        |      | 1,4-Bis(trimethylsilyl)benzene      | 78919  | 013153-70-5  | 43 |
| 34 | 28.212 | 3.10 | C:\Database\NIST11.L                |        |              |    |
|    |        |      | Cyclotrisiloxane, hexamethyl-       | 79617  | 000541-05-9  | 49 |
|    |        |      | 1,2-Bis(trimethylsilyl)benzene      | 78918  | 017151-09-6  | 49 |
|    |        |      | Tris(tert-butyltrimethylsilyloxy)ar | 230548 | 1000366-57-5 | 46 |
|    |        |      | sane                                |        |              |    |
| 35 | 28.345 | 2.98 | C:\Database\NIST11.L                |        |              |    |
|    |        |      | Silicic acid, diethyl bis(trimethyl | 140472 | 003555-45-1  | 38 |
|    |        |      | lsilyl) ester                       |        |              |    |
|    |        |      | 2,4,6-Cycloheptatrien-1-one, 3,5-b  | 102104 | 1000161-21-8 | 38 |
|    |        |      | is-trimethylsilyl-                  |        |              |    |
|    |        |      | Benzenetriol di-TMS derivative      | 225367 | 1000137-02-9 | 37 |
| 36 | 28.613 | 2.63 | C:\Database\NIST11.L                |        |              |    |
|    |        |      | Cyclotrisiloxane, hexamethyl-       | 79619  | 000541-05-9  | 50 |
|    |        |      | Benzo[h]quinoline, 2,4-dimethyl-    | 67018  | 000605-67-4  | 50 |
|    |        |      | Tetrasiloxane, decamethyl-          | 152276 | 000141-62-8  | 47 |
| 37 | 29.586 | 1.36 | C:\Database\NIST11.L                |        |              |    |
|    |        |      | 9H-Fluorene-2-carboxylic acid, 9-o  | 128371 | 1000316-02-1 | 47 |
|    |        |      | xo-, (2-hydroxyethyl)(methyl)amide  |        |              |    |
|    |        |      | Tetrasiloxane, decamethyl-          | 152279 | 000141-62-8  | 43 |
|    |        |      | Cyclotrisiloxane, hexamethyl-       | 79619  | 000541-05-9  | 43 |
| 38 | 30.024 | 1.03 | C:\Database\NIST11.L                |        |              |    |
|    |        |      | Acetamide, N-[4-(trimethylsilyl)ph  | 66793  | 017983-71-0  | 53 |
|    |        |      | enyl]-                              |        |              |    |
|    |        |      | (E)-2-bromobutylloxychalcone        | 189228 | 1000370-38-6 | 47 |
|    |        |      | 1,2-Bis(trimethylsilyl)benzene      | 78918  | 017151-09-6  | 47 |
| 39 | 31.272 | 0.69 | C:\Database\NIST11.L                |        |              |    |
|    |        |      | Methyl 3-bromo-1-adamantaneacetate  | 132323 | 014575-01-0  | 50 |
|    |        |      | Cyclotrisiloxane, hexamethyl-       | 79617  | 000541-05-9  | 46 |
|    |        |      | Tris(tert-butyltrimethylsilyloxy)ar | 230548 | 1000366-57-5 | 46 |
|    |        |      | sane                                |        |              |    |

UN\_KNOWN\_11.M Tue Jan 06 12:42:36 2015
