# Supplementary material for: Chemotaxis and degradation of organophosphate compound by a novel moderately thermo-halo tolerant Pseudomonas sp. strain BUR11: evidence for possible existence of two pathways for degradation
Source: PeerJ journal article supplement (doi:10.7717/peerj.1378), 2015-11-10
Supplement: Raw_data.zip [file Raw_data.zip]

## SAMPLE INFORMATION

|                   |                          |                     |          |
|-------------------|--------------------------|---------------------|----------|
| Sample Name:      | par 48 t                 | Acquired By:        | System   |
| Sample Type:      | Unknown                  | Sample Set Name:    |          |
| Vial:             | 1                        | Acq. Method Set:    | training |
| Injection #:      | 4                        | Processing Method:  | par 72 t |
| Injection Volume: | 20.00 ul                 | Channel Name:       | 486      |
| Run Time:         | 15.0 Minutes             | Proc. Chnl. Descr.: |          |
|                   |                          |                     |          |
| Date Acquired:    | 9/12/2013 1:38:56 PM IST |                     |          |
| Date Processed:   | 9/13/2013 1:08:37 PM IST |                     |          |

## Auto-Scaled Chromatogram

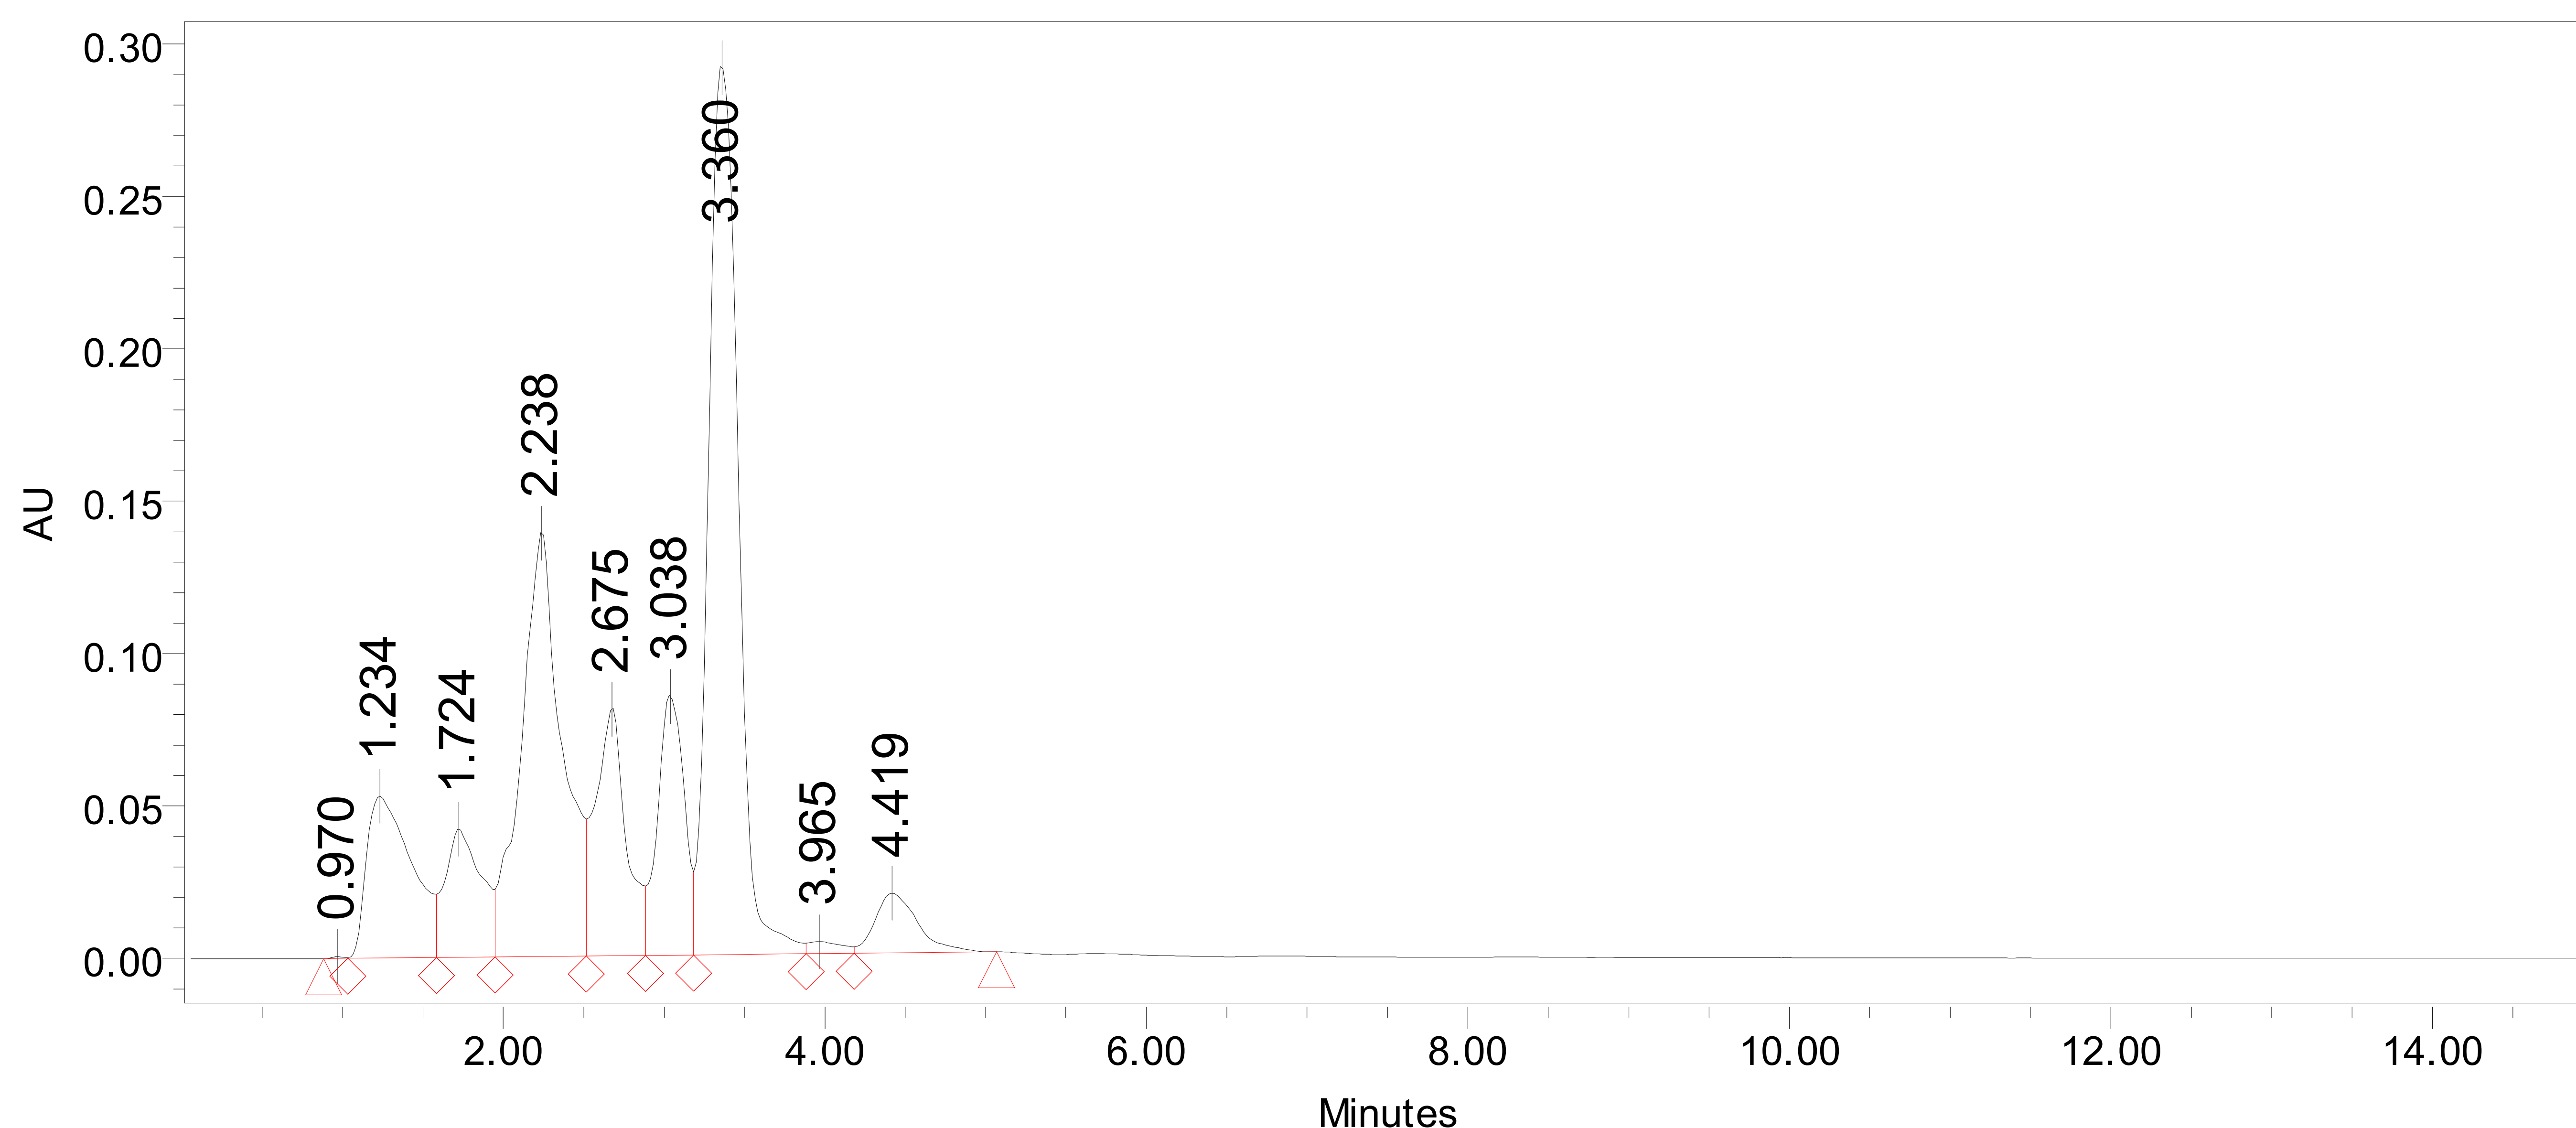

## Peak Results

|   | Name | RT    | Area    | Height | Amount | Units |
|---|------|-------|---------|--------|--------|-------|
| 1 |      | 0.970 | 2974    | 638    |        |       |
| 2 |      | 1.234 | 1045735 | 53118  |        |       |
| 3 |      | 1.724 | 666354  | 42191  |        |       |
| 4 |      | 2.238 | 2469610 | 139122 |        |       |
| 5 |      | 2.675 | 1084261 | 81501  |        |       |
| 6 |      | 3.038 | 982502  | 85441  |        |       |
| 7 |      | 3.360 | 3732910 | 293001 |        |       |
| 8 |      | 3.965 | 57397   | 3953   |        |       |
| 9 |      | 4.419 | 360011  | 19602  |        |       |
