# Supplementary material for: Chemotaxis and degradation of organophosphate compound by a novel moderately thermo-halo tolerant Pseudomonas sp. strain BUR11: evidence for possible existence of two pathways for degradation
Source: PeerJ journal article supplement (doi:10.7717/peerj.1378), 2015-11-10
Supplement: Raw_data.zip [file Raw_data.zip]

## SAMPLE INFORMATION

|                   |                          |                     |          |
|-------------------|--------------------------|---------------------|----------|
| Sample Name:      | par cont                 | Acquired By:        | System   |
| Sample Type:      | Unknown                  | Sample Set Name:    |          |
| Vial:             | 1                        | Acq. Method Set:    | training |
| Injection #:      | 8                        | Processing Method:  | par cont |
| Injection Volume: | 20.00 ul                 | Channel Name:       | 486      |
| Run Time:         | 15.0 Minutes             | Proc. Chnl. Descr.: |          |
|                   |                          |                     |          |
| Date Acquired:    | 9/11/2013 5:21:19 PM IST |                     |          |
| Date Processed:   | 9/13/2013 1:02:26 PM IST |                     |          |

## Auto-Scaled Chromatogram

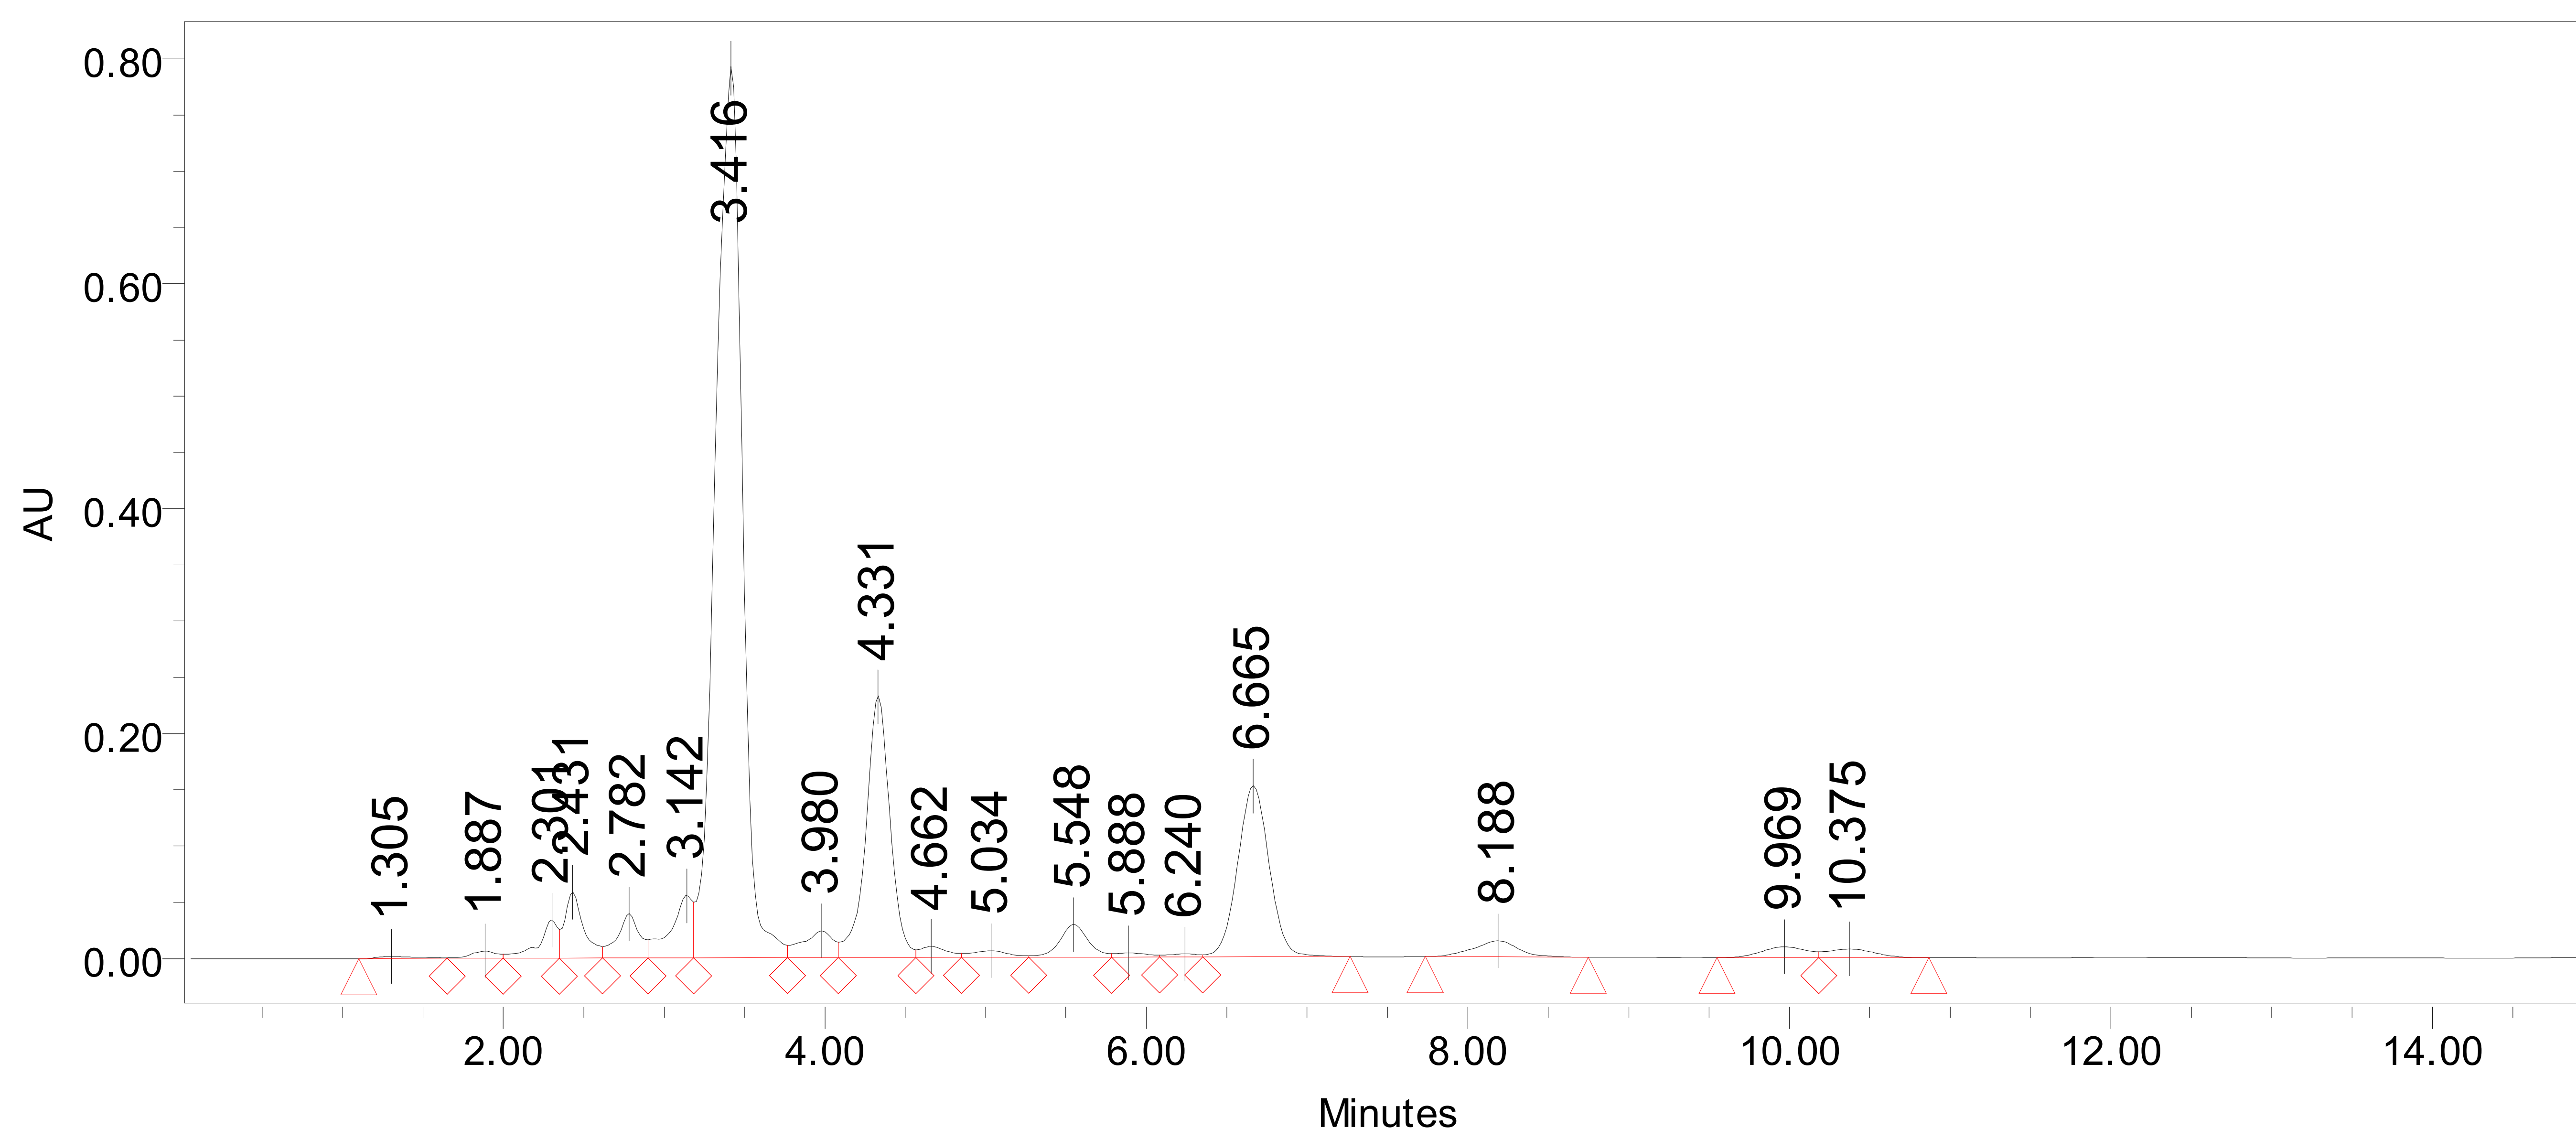

## Peak Results

|    | Name | RT    | Area    | Height | Amount | Units |
|----|------|-------|---------|--------|--------|-------|
| 1  |      | 1.305 | 34621   | 1811   |        |       |
| 2  |      | 1.887 | 72574   | 6469   |        |       |
| 3  |      | 2.301 | 279383  | 33897  |        |       |
| 4  |      | 2.431 | 481754  | 58606  |        |       |
| 5  |      | 2.782 | 377943  | 39245  |        |       |
| 6  |      | 3.142 | 530923  | 55814  |        |       |
| 7  |      | 3.416 | 9162348 | 791680 |        |       |
| 8  |      | 3.980 | 318735  | 23959  |        |       |
| 9  |      | 4.331 | 2435391 | 232430 |        |       |
| 10 |      | 4.662 | 117316  | 9818   |        |       |

Peak Results

|    | Name | RT     | Area    | Height | Amount | Units |
|----|------|--------|---------|--------|--------|-------|
| 11 |      | 5.034  | 94403   | 5805   |        |       |
| 12 |      | 5.548  | 357720  | 29000  |        |       |
| 13 |      | 5.888  | 51758   | 3736   |        |       |
| 14 |      | 6.240  | 34527   | 2591   |        |       |
| 15 |      | 6.665  | 2073915 | 152014 |        |       |
| 16 |      | 8.188  | 278197  | 14394  |        |       |
| 17 |      | 9.969  | 185788  | 9568   |        |       |
| 18 |      | 10.375 | 155049  | 7617   |        |       |
