# Supplementary material for: Chemotaxis and degradation of organophosphate compound by a novel moderately thermo-halo tolerant Pseudomonas sp. strain BUR11: evidence for possible existence of two pathways for degradation
Source: PeerJ journal article supplement (doi:10.7717/peerj.1378), 2015-11-10
Supplement: Raw_data.zip [file Raw_data.zip]

## SAMPLE INFORMATION

|                   |                          |                     |          |
|-------------------|--------------------------|---------------------|----------|
| Sample Name:      | par 96 t                 | Acquired By:        | System   |
| Sample Type:      | Unknown                  | Sample Set Name:    |          |
| Vial:             | 1                        | Acq. Method Set:    | training |
| Injection #:      | 7                        | Processing Method:  | par 96 t |
| Injection Volume: | 20.00 ul                 | Channel Name:       | 486      |
| Run Time:         | 15.0 Minutes             | Proc. Chnl. Descr.: |          |
|                   |                          |                     |          |
| Date Acquired:    | 9/12/2013 3:15:09 PM IST |                     |          |
| Date Processed:   | 9/13/2013 1:09:48 PM IST |                     |          |

## Auto-Scaled Chromatogram

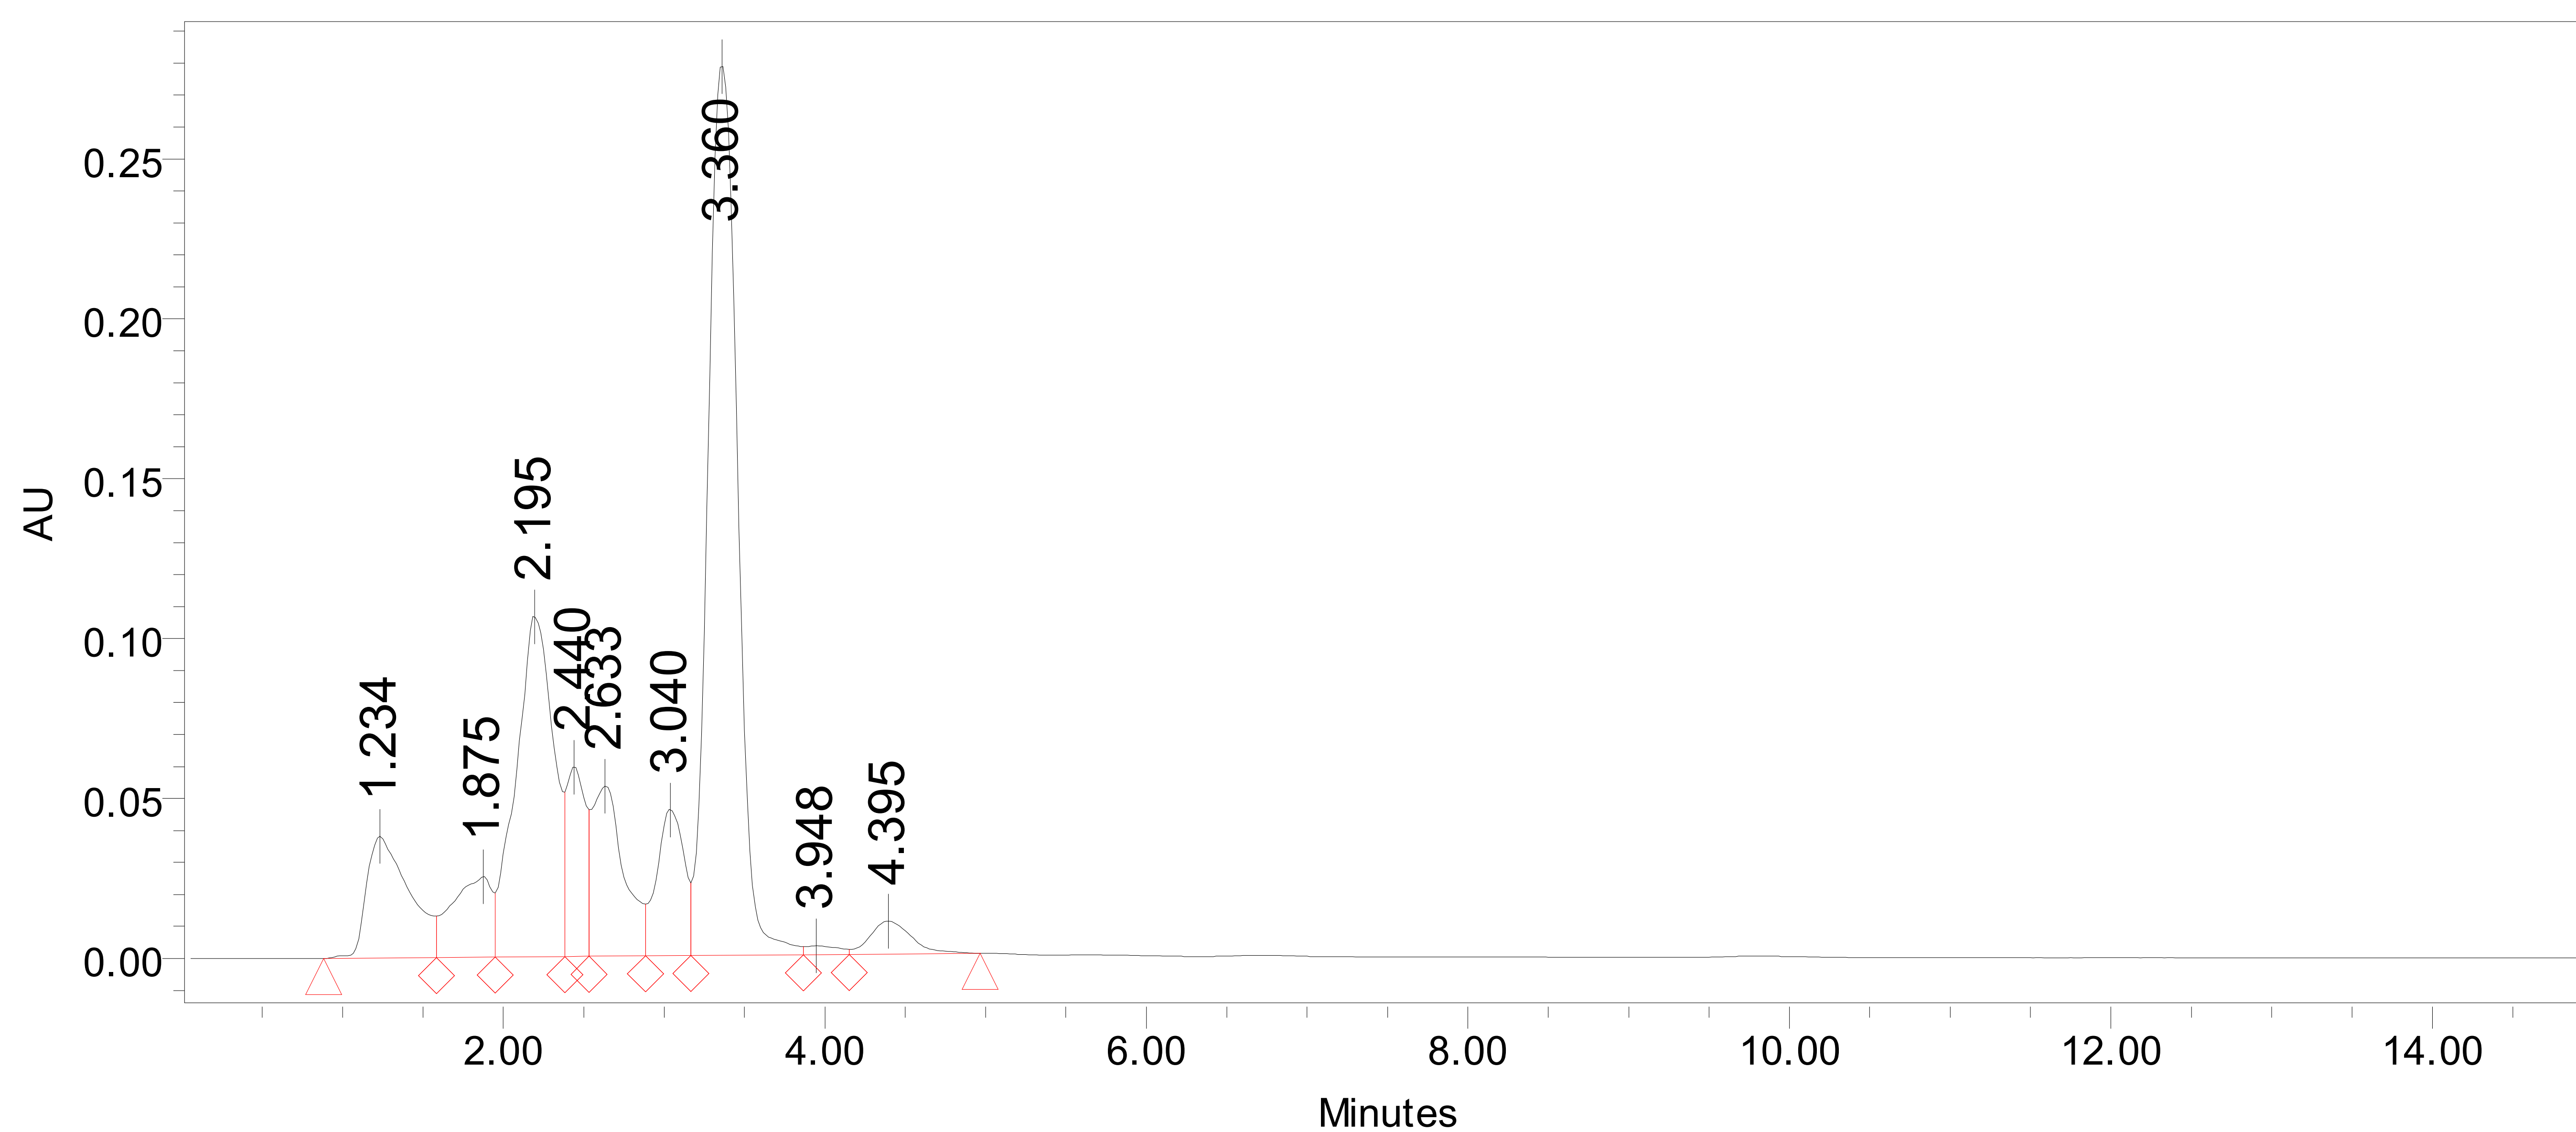

## Peak Results

|   | Name | RT    | Area    | Height | Amount | Units |
|---|------|-------|---------|--------|--------|-------|
| 1 |      | 1.234 | 703346  | 37959  |        |       |
| 2 |      | 1.875 | 438437  | 25282  |        |       |
| 3 |      | 2.195 | 1752517 | 107255 |        |       |
| 4 |      | 2.440 | 484047  | 59246  |        |       |
| 5 |      | 2.633 | 740317  | 53165  |        |       |
| 6 |      | 3.040 | 546469  | 45900  |        |       |
| 7 |      | 3.360 | 3548204 | 278711 |        |       |
| 8 |      | 3.948 | 39336   | 2716   |        |       |
| 9 |      | 4.395 | 184959  | 10301  |        |       |
